# Supplementary material for: P3-type layered K0.6Cr0.6Ti0.4O2 for potassium storage applications
Source: Royal Society of Chemistry journal article supplement (doi:10.1039/d2ya00223j), 2022-12-03
Supplement: d2ya00223j1.pdf [file d2ya00223j1.pdf]

**Supporting Information for**  
**P3-type Layered  $K_{0.6}Cr_{0.6}Ti_{0.4}O_2$  for Potassium Storage Applications**

Alok K. Pandey,<sup>1</sup> Benoît D.L. Campéon,<sup>2</sup> Istuki Konuma,<sup>1</sup> and Naoaki Yabuuchi\*<sup>1,2</sup>

<sup>1</sup>Department of Chemistry and Life Science, Yokohama National University, 79-5 Tokiwadai,  
Hodogaya-ku, Yokohama, Kanagawa 240-8501, Japan

<sup>2</sup>Advanced Chemical Energy Research Center, Institute of Advanced Sciences, Yokohama National  
University, 79-5 Tokiwadai, Hodogaya-ku, Yokohama, Kanagawa 240-8501, Japan

\*corresponding author, e-mail: [yabuuchi-naoaki-pw@ynu.ac.jp](mailto:yabuuchi-naoaki-pw@ynu.ac.jp)

**Supporting Table S1.** Crystallographic parameters refined by Rietveld analysis of XRD data ( $\lambda = 1.5418 \text{ \AA}$ ) of  $\text{K}_{0.6}\text{Cr}_{0.6}\text{Ti}_{0.4}\text{O}_2$  at  $25 \text{ }^\circ\text{C}$ .

| Formula $\square \text{K}_{0.6}\text{Cr}_{0.6}\text{Ti}_{0.4}\text{O}_2$ |      |      |       |       |                     |       |
|--------------------------------------------------------------------------|------|------|-------|-------|---------------------|-------|
| Space group $\square R-3m$                                               |      |      |       |       |                     |       |
| $a = 2.968 \text{ \AA}, c = 19.06 \text{ \AA}$                           |      |      |       |       |                     |       |
| $R_{\text{wp}} = 19.8\%, R_{\text{B}} = 12.0\%$                          |      |      |       |       |                     |       |
| atom                                                                     | site | $x$  | $y$   | $z$   | $B / \text{\AA}^2*$ | $g^*$ |
| K                                                                        | 18h  | 0.10 | -0.10 | 0.169 | 0.8                 | 0.1   |
| Cr                                                                       | 3a   | 0    | 0     | 0     | 0.5                 | 0.6   |
| Ti                                                                       | 3a   | 0    | 0     | 0     | 0.5                 | 0.4   |
| O                                                                        | 6c   | 0    | 0     | 0.377 | 1.0                 | 1.0   |

\* Not refined

**Supporting Table S2.** Unit cell volume changes of some reported K-based layered positive electrodes.

| Composition                                                             | Volume change upon charge/discharge (%) | Reference |
|-------------------------------------------------------------------------|-----------------------------------------|-----------|
| $\text{K}_{0.67}\text{MnO}_2$                                           | 9.9                                     | 1         |
| $\text{K}_{0.75}[\text{Ni}_{1/3}\text{Mn}_{2/3}]\text{O}_2$             | 3.1                                     | 2         |
| $\text{K}_{0.3}\text{Mn}_{0.95}\text{Co}_{0.05}\text{O}_2$              | 2.5                                     | 3         |
| $\text{K}_{0.3}\text{MnO}_2$                                            | 1.5                                     | 3         |
| $\text{K}_{0.4}\text{Fe}_{0.1}\text{Mn}_{0.8}\text{Ti}_{0.1}\text{O}_2$ | 0.5                                     | 4         |
| $\text{K}_{0.8}\text{CrO}_2$                                            | 1.08                                    | 5         |
| $\text{K}_{0.6}\text{Cr}_{0.6}\text{Ti}_{0.4}\text{O}_2$                | 0.27                                    | This work |

**Supporting Table S3.** Electrode performance of some reported positive electrode materials for K-ion batteries.

| <b>Material</b>                      | <b>Specific Capacity<br/>(mA h g<sup>-1</sup>)</b> | <b>Average<br/>Voltage<br/>(V)</b> | <b>Cycling Stability<br/>(Capacity retention)</b> | <b>Ref.</b> |
|--------------------------------------|----------------------------------------------------|------------------------------------|---------------------------------------------------|-------------|
| $K_{0.3}MnO_2$                       | 65 (27.9 mA g <sup>-1</sup> )                      | 2.6                                | 57% (685 cycles)                                  | 6           |
| $K_{0.5}MnO_2$                       | 100 (5 mA g <sup>-1</sup> )                        | 2.6                                | 70% (50 cycles)                                   | 7           |
| $K_{0.41}CoO_2$                      | 60 (11.8 mA g <sup>-1</sup> )                      | 3.1                                | 95% (30 cycles)                                   | 8           |
| $K_{0.6}CoO_2$                       | 80 (2 mA g <sup>-1</sup> )                         | 2.7                                | 60% (120 cycles)                                  | 9           |
| $K_{0.69}CrO_2$                      | 85 (100 mA g <sup>-1</sup> )                       | 2.6                                | 65% (1000 cycles)                                 | 10          |
| $KCrO_2$                             | 90 (5 mA g <sup>-1</sup> )                         | 2.73                               | 65% (100 cycles)                                  | 11          |
| $K_{0.5}Mn_{0.8}Co_{0.1}Ni_{0.1}O_2$ | 94.5 (20 mA g <sup>-1</sup> )                      | 2.5                                | 63% (300 cycles)                                  | 12          |
| $K_{0.48}Mn_{0.4}Co_{0.6}O_2$        | 64 (C/20)                                          | 3                                  | 81% (180 cycles)                                  | 13          |
| $K_{0.6}Cr_{0.6}Ti_{0.4}O_2$         | 43 (5 mA g <sup>-1</sup> )                         | 3.14                               | 98% (500 cycles)                                  | This work   |

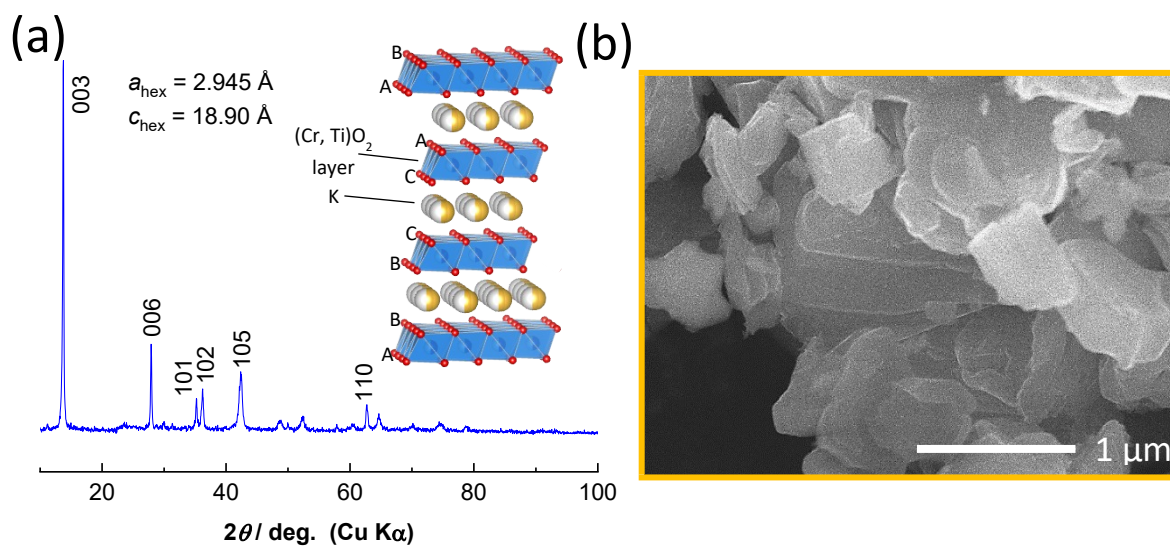

**Supporting Figure S1.** (a) An XRD pattern of  $\text{K}_{0.5}\text{Cr}_{0.5}\text{Ti}_{0.5}\text{O}_2$  with schematic illustration of the P3-type layered structure, (b) a SEM image of  $\text{K}_{0.5}\text{Cr}_{0.5}\text{Ti}_{0.5}\text{O}_2$ .

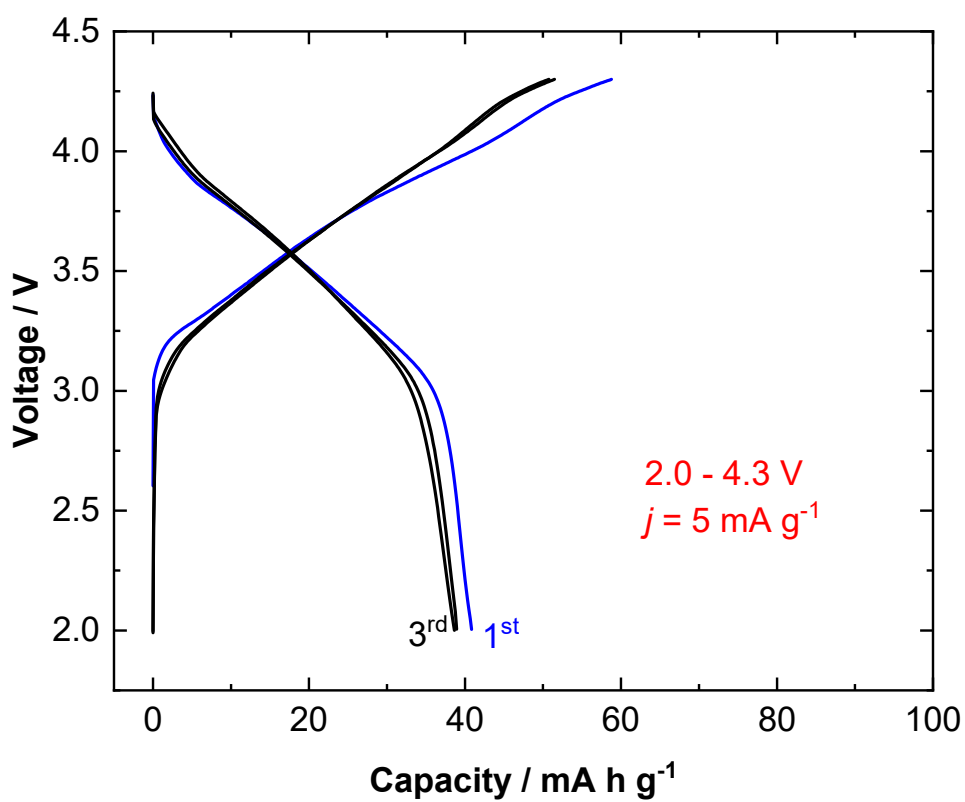

**Supporting Figure S2.** Charge/discharge profiles of  $\text{K}_{0.5}\text{Cr}_{0.5}\text{Ti}_{0.5}\text{O}_2$  in the potential range of 2.0 – 4.3 V at a current rate of  $5 \text{ mA g}^{-1}$ .

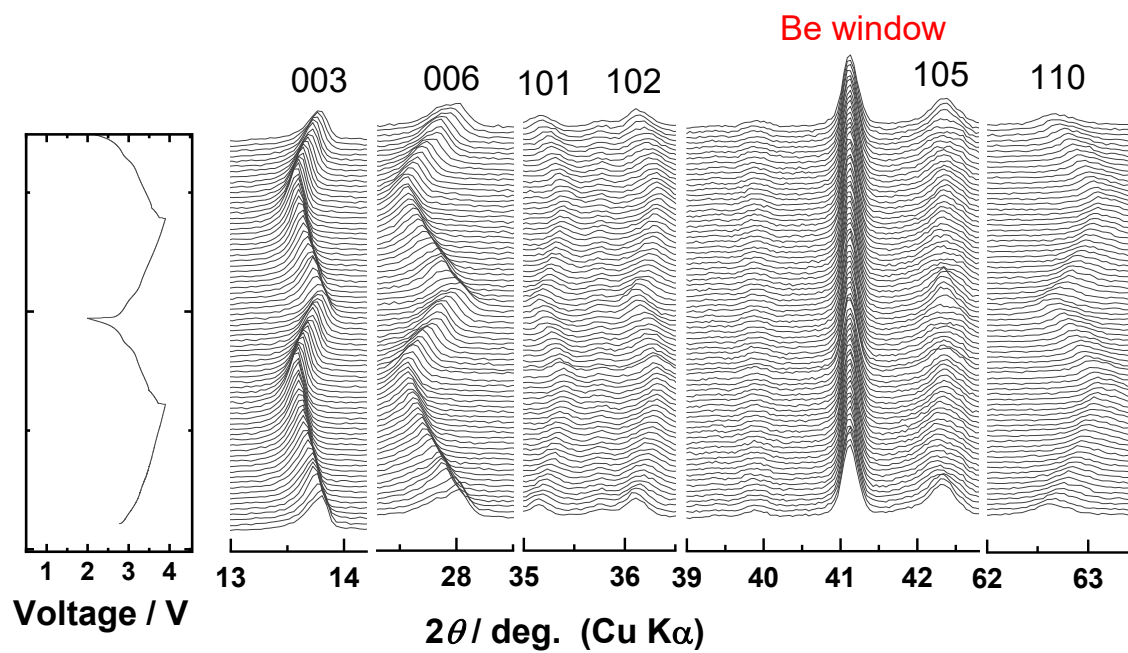

**Supporting Figure S3.** *In-situ* XRD patterns of  $\text{K}_{0.6-y}\text{Cr}_{0.6}\text{Ti}_{0.4}\text{O}_2$  during charge/discharge.

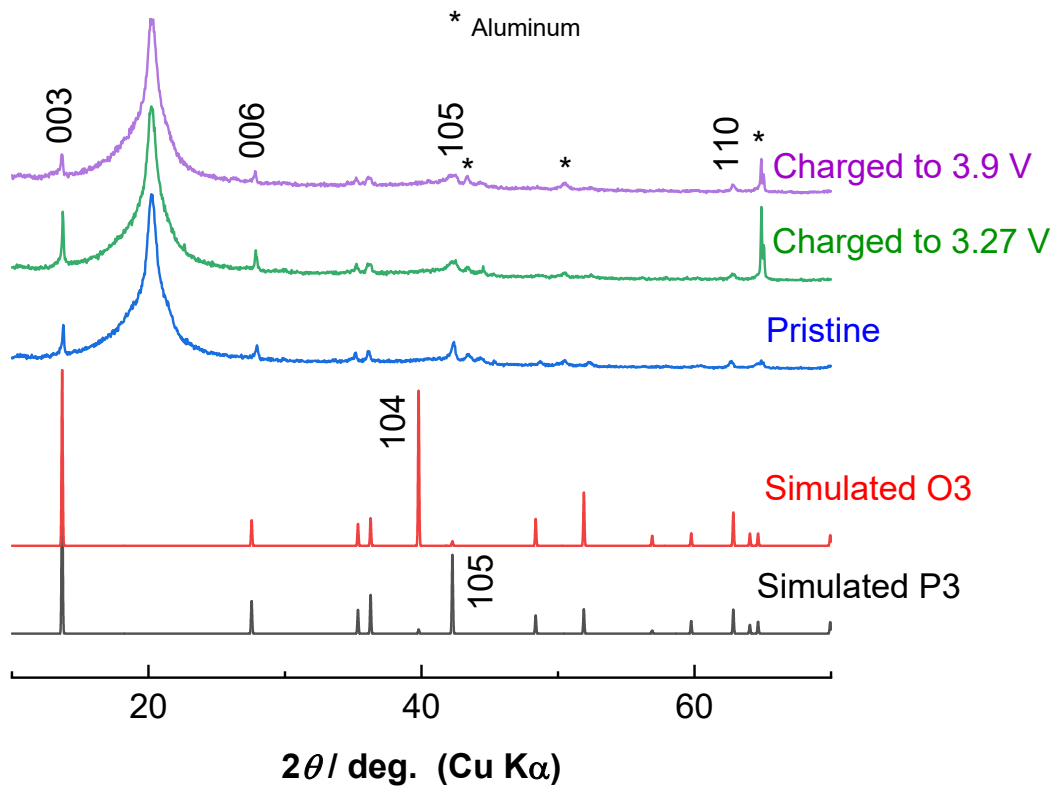

**Supporting Figure S4.** *Ex-situ* XRD patterns of  $K_{0.6-y}Cr_{0.6}Ti_{0.4}O_2$  at pristine, charged to 3.27 V, and charged to 3.9 V and their comparison with simulated XRD patterns of the O3- and P3-type layered structures. Note that a large and broad peak at 20 degrees originates from Kapton film.

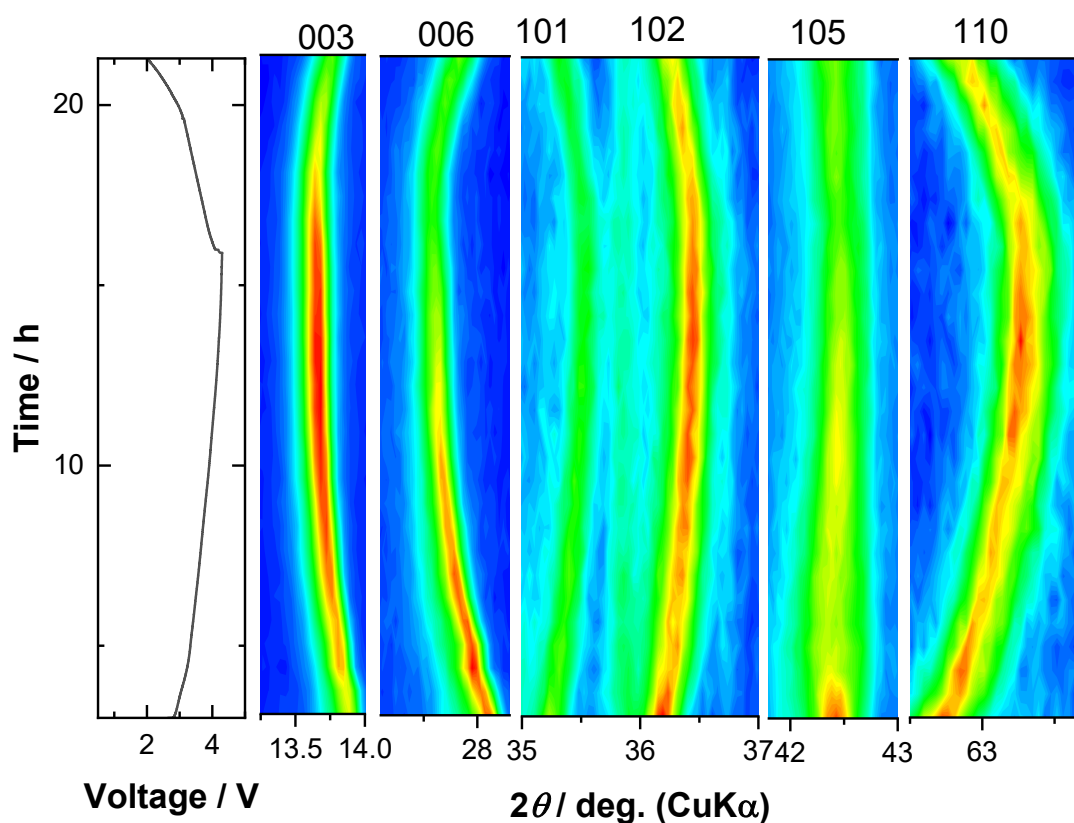

**Supporting Figure S5.** Contour plots of *in-situ* XRD data of  $K_{0.6-y}Cr_{0.6}Ti_{0.4}O_2$  during first cycle in the voltage range of 2.0 – 4.3 V at a rate of 6 mA g<sup>-1</sup>.

### Supporting References

1. K. Lei, Z. Zhu, Z. Yin, P. Yan, F. Li and J. Chen, *Chem*, 2019, **5**, 3220-3231.
2. J. H. Jo, J. U. Choi, Y. J. Park, Y. H. Jung, D. Ahn, T.-Y. Jeon, H. Kim, J. Kim and S.-T. Myung, *Advanced Energy Materials*, 2020, **10**, 1903605.
3. Q. Zhang, C. Didier, W. K. Pang, Y. Liu, Z. Wang, S. Li, V. K. Peterson, J. Mao and Z. Guo, *Advanced Energy Materials*, 2019, **9**, 1900568.
4. X. Zhang, D. Yu, Z. Wei, N. Chen, G. Chen, Z. X. Shen and F. Du, *ACS Applied Materials & Interfaces*, 2021, **13**, 18897-18904.
5. N. Naveen, S. C. Han, S. P. Singh, D. Ahn, K.-S. Sohn and M. Pyo, *Journal of Power Sources*, 2019, **430**, 137-144.
6. C. Vaalma, G. A. Giffin, D. Buchholz and S. Passerini, *Journal of The Electrochemical Society*, 2016, **163**, A1295.
7. H. Kim, D.-H. Seo, J. C. Kim, S.-H. Bo, L. Liu, T. Shi and G. Ceder, *Advanced Materials*, 2017, **29**, 1702480.
8. Y. Hironaka, K. Kubota and S. Komaba, *Chemical Communications*, 2017, **53**, 3693-3696.

9. H. Kim, J. C. Kim, S.-H. Bo, T. Shi, D.-H. Kwon and G. Ceder, *Advanced Energy Materials*, 2017, **7**, 1700098.
10. J.-Y. Hwang, J. Kim, T.-Y. Yu, S.-T. Myung and Y.-K. Sun, *Energy & Environmental Science*, 2018, **11**, 2821-2827.
11. H. Kim, D.-H. Seo, A. Urban, J. Lee, D.-H. Kwon, S.-H. Bo, T. Shi, J. K. Papp, B. D. McCloskey and G. Ceder, *Chemistry of Materials*, 2018, **30**, 6532-6539.
12. L. Duan, Y. Xu, Z. Zhang, J. Xu, J. Liao, J. Xu, Y. Sun, Y. He and X. Zhou, *Journal of Materials Chemistry A*, 2021, **9**, 22820-22826.
13. K. Sada and P. Barpanda, *Chemical Communications*, 2020, **56**, 2272-2275.
